# Supplementary material for: Food insecurity, diet quality, and suboptimal diabetes management among US adults with diabetes
Source: PubMed Central journal article supplement — BMJ Open Diabetes Res Care. 2022 Oct 26;10(5):e003033. doi: 10.1136/bmjdrc-2022-003033 (PMC9615992; doi:10.1136/bmjdrc-2022-003033), 2022-10-26
Supplement: bmjdrc-2022-003033supp001.pdf [file bmjdrc-2022-003033supp001.pdf]

Appendix Table 1. Characteristics (% , SE) of U.S. Adults with Diagnosed Diabetes by Food Insecurity and Diet Quality

|                                         | Total      | Food Insecurity |            |               | p-value          | Diet Quality (HEI-2015) Quartiles |                 |                 |                       | p-value          |
|-----------------------------------------|------------|-----------------|------------|---------------|------------------|-----------------------------------|-----------------|-----------------|-----------------------|------------------|
|                                         |            | Food secure     | Marginal   | Food insecure |                  | 4 <sup>th</sup> (High)            | 3 <sup>rd</sup> | 2 <sup>nd</sup> | 1 <sup>st</sup> (Low) |                  |
| <b>Unweighted N</b>                     |            | 1356            | 330        | 589           |                  | 504                               | 512             | 555             | 560                   |                  |
| <b>Total</b>                            | 100.0      | 68.0 (1.4)      | 12.7 (1.0) | 19.3 (1.3)    |                  | 26.2 (1.5)                        | 23.3 (1.0)      | 25.8 (1.2)      | 24.7 (1.1)            |                  |
| <b>DEMOGRAPHICS</b>                     |            |                 |            |               |                  |                                   |                 |                 |                       |                  |
| <b>Age, years</b>                       |            |                 |            |               |                  |                                   |                 |                 |                       |                  |
| Mean                                    | 60.4 (0.4) | 61.6 (0.4)      | 58.8 (1.2) | 57.1 (0.7)    |                  | 62.4 (0.8)                        | 60.9 (0.8)      | 60.0 (0.6)      | 57.9 (0.8)            |                  |
| 20-44                                   | 13.0 (0.7) | 10.1 (0.9)      | 15.6 (3.0) | 21.1 (1.8)    | <b>&lt;0.001</b> | 7.9 (1.7)                         | 11.9 (1.4)      | 14.3 (1.7)      | 16.3 (2.3)            | <b>0.006</b>     |
| 45-64                                   | 45.6 (1.5) | 45.8 (1.8)      | 45.4 (4.6) | 46.7 (3.3)    |                  | 44.7 (3.0)                        | 43.4 (3.3)      | 47.3 (3.3)      | 51.3 (3.1)            |                  |
| ≥65                                     | 41.5 (1.5) | 44.1 (1.7)      | 39.0 (4.3) | 32.2 (2.9)    |                  | 47.4 (3.3)                        | 44.6 (3.8)      | 38.5 (2.8)      | 32.5 (2.7)            |                  |
| <b>Sex</b>                              |            |                 |            |               |                  |                                   |                 |                 |                       |                  |
| Men                                     | 53.0 (1.7) | 57.3 (2.2)      | 43.8 (3.3) | 43.2 (2.0)    | <b>&lt;0.001</b> | 54.6 (3.7)                        | 49.1 (3.2)      | 52.2 (3.7)      | 57.6 (2.9)            | 0.150            |
| Women                                   | 47.0 (1.7) | 42.7 (2.1)      | 56.2 (3.3) | 56.8 (2.0)    |                  | 45.4 (3.7)                        | 50.9 (3.2)      | 47.8 (3.7)      | 42.4 (2.9)            |                  |
| <b>Race and ethnicity</b>               |            |                 |            |               |                  |                                   |                 |                 |                       |                  |
| Non-Hispanic White                      | 63.4 (2.2) | 69.1 (2.2)      | 54.2 (5.0) | 49.3 (4.0)    | <b>&lt;0.001</b> | 61.6 (3.4)                        | 60.0 (4.0)      | 69.6 (2.7)      | 68.0 (3.0)            | <b>&lt;0.001</b> |
| Non-Hispanic Black                      | 14.0 (1.4) | 12.4 (1.4)      | 18.7 (3.1) | 17.4 (2.2)    |                  | 12.3 (1.8)                        | 17.0 (2.3)      | 12.6 (1.7)      | 13.2 (2.0)            |                  |
| Hispanic/Latino                         | 16.5 (1.8) | 12.1 (1.6)      | 21.1 (3.5) | 29.3 (3.2)    |                  | 17.0 (2.2)                        | 16.5 (2.6)      | 15.4 (2.4)      | 16.2 (2.1)            |                  |
| Non-Hispanic Asian                      | 6.1 (0.8)  | 6.5 (0.9)       | 6.0 (1.4)  | 4.0 (0.8)     |                  | 9.2 (1.3)                         | 6.5 (1.6)       | 2.4 (0.7)       | 2.7 (0.6)             |                  |
| <b>SOCIODEMOGRAPHIC CHARACTERISTICS</b> |            |                 |            |               |                  |                                   |                 |                 |                       |                  |
| <b>Poverty Income Ratio</b>             |            |                 |            |               |                  |                                   |                 |                 |                       |                  |
| <1.00                                   | 15.3 (1.2) | 8.0 (1.0)       | 17.7 (3.2) | 41.3 (3.1)    | <b>&lt;0.001</b> | 10.6 (1.6)                        | 14.1 (2.1)      | 16.1 (2.2)      | 18.6 (2.5)            | <b>0.010</b>     |
| 1.00-2.00                               | 20.0 (1.2) | 15.5 (1.2)      | 30.1 (3.2) | 31.9 (2.8)    |                  | 18.1 (2.1)                        | 20.9 (2.4)      | 20.7 (2.1)      | 21.0 (2.4)            |                  |
| >2.00                                   | 55.7 (1.9) | 69.9 (1.9)      | 45.1 (4.8) | 20.4 (2.7)    |                  | 61.9 (3.4)                        | 56.4 (3.7)      | 56.7 (3.2)      | 53.2 (3.4)            |                  |
| Missing                                 | 9.1 (0.9)  | 6.6 (0.7)       | 7.2 (2.0)  | 6.4 (1.3)     |                  | 9.5 (1.9)                         | 8.6 (1.9)       | 6.6 (1.8)       | 7.2 (1.9)             |                  |
| <b>Education</b>                        |            |                 |            |               |                  |                                   |                 |                 |                       |                  |
| <High school                            | 19.9 (1.4) | 15.0 (1.3)      | 18.4 (2.7) | 37.1 (2.7)    | <b>&lt;0.001</b> | 16.8 (1.9)                        | 19.3 (2.3)      | 18.1 (2.1)      | 22.9 (2.8)            | 0.130            |
| High school graduate                    | 25.0 (1.2) | 23.1 (1.6)      | 34.2 (4.1) | 27.2 (2.1)    |                  | 23.6 (2.6)                        | 27.7 (3.1)      | 25.1 (2.9)      | 26.4 (2.7)            |                  |
| Some college                            | 33.8 (1.5) | 35.0 (2.2)      | 34.6 (4.0) | 30.1 (2.3)    |                  | 29.8 (3.0)                        | 33.3 (3.0)      | 37.4 (3.3)      | 35.7 (3.7)            |                  |
| College graduate or                     | 21.4 (1.5) | 27.0 (2.1)      | 12.8 (2.6) | 5.6 (1.2)     |                  | 29.8 (3.4)                        | 19.7 (3.1)      | 19.5 (2.6)      | 15.0 (3.2)            |                  |

|                                                |            |             |            |            |                  |            |            |            |            |              |
|------------------------------------------------|------------|-------------|------------|------------|------------------|------------|------------|------------|------------|--------------|
| Above                                          |            |             |            |            |                  |            |            |            |            |              |
| <b>Received SNAP benefits, past 12 mo.</b>     |            |             |            |            |                  |            |            |            |            |              |
| Yes                                            | 20.7 (1.3) | 11.8 (1.3)  | 25.5 (3.0) | 48.9 (3.2) | <b>&lt;0.001</b> | 25.0 (2.2) | 22.9 (2.3) | 17.0 (1.9) | 15.9 (2.0) | <b>0.008</b> |
| No                                             | 79.3 (1.3) | 88.2 (1.3)  | 74.5 (3.2) | 51.1 (3.2) |                  | 75.0 (2.2) | 77.1 (2.3) | 83.0 (1.9) | 84.1 (2.0) |              |
| <b>Health Insurance</b>                        |            |             |            |            |                  |            |            |            |            |              |
| Uninsured                                      | 8.1 (0.8)  | 6.0 (2.1)   | 9.8 (2.1)  | 14.8 (1.8) | <b>&lt;0.001</b> | 6.0 (1.1)  | 8.0 (1.3)  | 10.0 (1.8) | 9.1 (1.7)  | 0.170        |
| Insured                                        | 91.9 (0.8) | 94.0 (0.8)  | 90.2 (2.1) | 85.3 (1.8) |                  | 94.0 (1.1) | 92.0 (1.3) | 90.0 (1.8) | 91.0 (1.7) |              |
| <b>Health Insurance Type</b>                   |            |             |            |            |                  |            |            |            |            |              |
| Private                                        | 60.0 (1.8) | 65.4 (2.2)  | 62.4 (3.9) | 36.0 (3.0) | <b>&lt;0.001</b> | 60.2 (3.6) | 64.2 (3.6) | 60.1 (3.9) | 59.9 (2.5) | 0.650        |
| Medicare                                       | 46.7 (1.8) | 46.0 (1.1)  | 43.7 (4.3) | 50.0 (3.1) | 0.350            | 47.9 (3.2) | 49.0 (4.0) | 47.2 (3.0) | 40.7 (3.3) | 0.310        |
| Medicaid                                       | 13.9 (1.1) | 5.7 (1.2)   | 16.4 (3.0) | 32.5 (2.6) | <b>&lt;0.001</b> | 11.4 (1.8) | 12.5 (2.0) | 15.1 (2.5) | 15.0 (1.8) | 0.260        |
| Military/Other Government                      | 15.2 (1.1) | 15.4 (1.56) | 9.5 (1.87) | 19.5 (2.6) | <b>0.006</b>     | 14.1 (2.0) | 16.1 (2.3) | 18.3 (3.0) | 11.0 (1.5) | 0.150        |
| <b>HEALTHCARE UTILIZATION</b>                  |            |             |            |            |                  |            |            |            |            |              |
| <b>Seen a Physician in past year</b>           |            |             |            |            |                  |            |            |            |            |              |
| Yes                                            | 96.9 (0.4) | 97.9 (0.6)  | 96.4 (1.4) | 93.2 (1.2) | <b>0.010</b>     | 96.8 (1.2) | 97.1 (0.9) | 97.8 (1.3) | 95.6 (1.3) | 0.510        |
| No                                             | 3.1 (0.4)  | 2.1 (0.6)   | 3.6 (1.4)  | 6.8 (1.2)  |                  | 3.2 (1.2)  | 2.9 (0.9)  | 2.21 (0.6) | 4.4 (1.3)  |              |
| <b>Seen a Diabetes specialist in past year</b> |            |             |            |            |                  |            |            |            |            |              |
| Yes                                            | 29.9 (1.2) | 30.1 (1.8)  | 27.3 (3.1) | 31.6 (2.1) | 0.820            | 33.7 (3.5) | 33.3 (2.7) | 23.1 (2.2) | 26.8 (3.2) | <b>0.030</b> |
| No                                             | 34.8 (1.7) | 35.0 (2.1)  | 34.6 (3.3) | 33.3 (2.4) |                  | 33.5 (2.5) | 34.5 (3.3) | 36.7 (3.2) | 34.8 (3.1) |              |
| Never                                          | 35.3 (1.5) | 34.9 (1.7)  | 38.2 (3.7) | 35.1 (2.6) |                  | 32.8 (2.6) | 32.3 (2.8) | 40.2 (3.0) | 38.3 (3.7) |              |
| <b>A1c Checked in past year</b>                |            |             |            |            |                  |            |            |            |            |              |
| Yes                                            | 82.5 (1.1) | 85.2 (1.3)  | 79.6 (3.1) | 73.9 (2.9) | <b>0.001</b>     | 88.0 (1.6) | 84.5 (1.7) | 81.6 (2.0) | 76.3 (2.9) | <b>0.040</b> |
| No                                             | 13.0 (0.9) | 10.3 (1.0)  | 16.3 (2.8) | 21.2 (2.5) |                  | 9.0 (1.5)  | 11.9 (1.7) | 13.8 (2.0) | 16.9 (2.4) |              |
| Do not know                                    | 4.6 (0.6)  | 4.6 (0.8)   | 4.1 (1.0)  | 4.9 (1.2)  |                  | 3.0 (0.6)  | 3.56 (1.1) | 4.6 (0.9)  | 6.9 (1.8)  |              |
| <b>CLINICAL CHARACTERISTICS</b>                |            |             |            |            |                  |            |            |            |            |              |
| <b>Smoking Status</b>                          |            |             |            |            |                  |            |            |            |            |              |

|                                           |            |            |             |             |              |            |            |            |            |                  |
|-------------------------------------------|------------|------------|-------------|-------------|--------------|------------|------------|------------|------------|------------------|
| Current                                   | 14.4 (1.1) | 10.9 (1.3) | 17.0 (3.1)  | 24.4 (2.4)  | <b>0.001</b> | 5.3 (1.3)  | 12.0 (2.0) | 16.1 (2.4) | 21.8 (2.7) | <b>&lt;0.001</b> |
| Former                                    | 36.5 (1.4) | 39.0 (2.0) | 35.4 (3.8)  | 30.0 (2.7)  |              | 42.3 (3.6) | 39.0 (3.3) | 36.1 (2.6) | 32.1 (3.1) |                  |
| Never                                     | 49.1 (1.3) | 50.2 (1.9) | 47.7 (4.1)  | 45.5 (2.8)  |              | 52.4 (3.5) | 49.0 (3.5) | 47.8 (3.2) | 46.2 (3.4) |                  |
| <b>Diabetes Medication</b>                |            |            |             |             |              |            |            |            |            |                  |
| Insulin only                              | 12.8 (1.0) | 11.1 (1.1) | 15.9 (3.2)  | 15.4 (2.6)  | <b>0.020</b> | 12.1 (2.2) | 10.5 (1.8) | 13.0 (1.9) | 11.5 (1.8) | 0.110            |
| Oral medication only                      | 55.5 (1.4) | 59.2 (2.0) | 50.8 (4.0)  | 44.5 (2.4)  |              | 59.1 (2.9) | 59.4 (3.2) | 52.8 (2.6) | 53.7 (3.7) |                  |
| Both insulin and oral medications         | 14.8 (1.0) | 13.6 (1.3) | 16.8 (2.6)  | 18.7 (1.8)  |              | 11.8 (1.7) | 14.8 (2.1) | 17.2 (2.0) | 15.4 (2.6) |                  |
| None reported                             | 17.0 (0.9) | 16.1 (1.4) | 16.5 (2.4)  | 21.3 (1.9)  |              | 17.1 (2.5) | 15.3 (2.2) | 17.1 (2.6) | 19.5 (2.5) |                  |
| <b>Taking Antihypertensive Medication</b> | 62.9 (1.7) | 65.1 (2.1) | 57.1 (4.3)  | 60.5 (2.1)  | 0.050        | 64.8 (3.0) | 61.3 (3.2) | 64.7 (3.4) | 60.3 (3.1) | 0.550            |
| <b>Taking Antilipidemic Medication</b>    | 59.4 (1.3) | 62.4 (1.7) | 50.9 (4.1)  | 55.2 (2.7)  | <b>0.008</b> | 60.5 (3.6) | 54.0 (2.7) | 63.3 (3.3) | 60.8 (3.2) | 0.070            |
| <b>BMI, kg/m<sup>2</sup></b>              |            |            |             |             |              |            |            |            |            |                  |
| Mean                                      | 33.0 (0.3) | 32.8 (0.3) | 33.3 (0.6)  | 34.1 (0.5)  |              | 31.5 (0.4) | 33.2 (0.5) | 34.0 (0.6) | 34.6 (0.6) |                  |
| <25.0 (Underweight/<br>healthy weight)    | 10.5 (0.9) | 10.8 (1.1) | 8.7 (1.9)   | 10.2 (1.4)  | 0.606        | 10.9 (1.8) | 11.5 (1.8) | 9.6 (1.4)  | 6.7 (1.8)  | <b>0.035</b>     |
| 25.0-29.9 (Overweight)                    | 27.7 (1.2) | 27.5 (1.6) | 30.9 (4.4)  | 24.6 (2.1)  |              | 33.0 (3.1) | 28.8 (3.1) | 22.2 (2.4) | 23.0 (3.1) |                  |
| ≥30 (Obesity)                             | 61.8 (1.7) | 61.6 (2.2) | 60.5 (4.3)  | 65.1 (2.4)  |              | 56.2 (3.6) | 59.7 (3.1) | 68.2 (2.7) | 70.2 (3.7) |                  |
| <b>FOOD INSECURITY AND DIET QUALITY</b>   |            |            |             |             |              |            |            |            |            |                  |
| <b>Food Insecurity Status</b>             |            |            |             |             |              |            |            |            |            |                  |
| Food secure                               | 68.0 (1.4) | NA         | NA          | NA          |              | 74.4 (2.7) | 67.8 (2.7) | 67.4 (2.8) | 63.3 (2.9) | 0.100            |
| Marginal                                  | 12.7 (1.0) | NA         | NA          | NA          |              | 11.6 (1.7) | 13.1 (1.8) | 12.2 (2.3) | 12.5 (1.7) |                  |
| Food insecure                             | 19.3 (1.3) | NA         | NA          | NA          |              | 14.1 (1.8) | 19.2 (2.4) | 20.5 (2.3) | 24.2 (2.7) |                  |
| <b>Healthy Eating Index</b>               |            |            |             |             |              |            |            |            |            |                  |
| Mean (SE)                                 | 53.6 (0.4) | 54.3 (0.5) | 53.0 (1.2)  | 51.0 (0.7)  |              | NA         | NA         | NA         | NA         |                  |
| Quartile 4 (High)                         | 26.2 (1.5) | 28.6 (1.9) | 24.7 (3.9)  | 19.0 (2.4)  | 0.100        | NA         | NA         | NA         | NA         |                  |
| Quartile 3                                | 23.3 (1.0) | 22.9 (1.6) | 24.5 (2.6)  | 22.8 (2.1)  |              | NA         | NA         | NA         | NA         |                  |
| Quartile 2                                | 25.8 (1.2) | 25.5 (1.6) | 25.6 (3.87) | 27.3 (2.58) |              | NA         | NA         | NA         | NA         |                  |
| Quartile 1 (Low)                          | 24.7 (1.1) | 22.9 (1.4) | 25.2 (3.3)  | 30.9 (2.5)  |              | NA         | NA         | NA         | NA         |                  |
| <b>METABOLIC</b>                          |            |            |             |             |              |            |            |            |            |                  |

| <b>OUTCOMES</b>                                    |            |            |              |                        |              |                        |                        |                        |                        |       |
|----------------------------------------------------|------------|------------|--------------|------------------------|--------------|------------------------|------------------------|------------------------|------------------------|-------|
| A1c ≥7.0%                                          | 49.8 (1.8) | 47.7 (2.3) | 52.2 (3.8)   | 54.8 (2.6)             | 0.120        | 43.9 (3.4)             | 46.9 (3.0)             | 51.7 (3.2)             | 54.9 (4.1)             | 0.050 |
| A1c ≥8.0%                                          | 26.1 (1.3) | 22.8 (1.8) | 29.8 (3.8)   | 34.2 (2.1)             | <b>0.002</b> | 20.1 (2.6)             | 25.8 (2.7)             | 25.4 (2.5)             | 28.2 (2.6)             | 0.120 |
| A1c ≥9.0%                                          | 14.4 (1.0) | 12.2 (1.3) | 15.0 (2.7)   | 21.9 (2.2)             | <b>0.003</b> | 11.9 (2.2)             | 14.3 (2.1)             | 12.6 (1.7)             | 18.1 (2.4)             | 0.250 |
| Blood Pressure ≥140/90 mmHg                        | 28.5 (1.5) | 27.8 (2.0) | 30.1 (3.4)   | 29.4 (2.8)             | 0.800        | 29.6 (2.7)             | 25.4 (2.7)             | 29.7 (3.0)             | 28.3 (2.7)             | 0.550 |
| Blood Pressure ≥130/80 mmHg                        | 52.0 (1.5) | 51.5 (2.3) | 52.9 (4.7)   | 51.6 (3.1)             | 0.970        | 51.9 (3.1)             | 51.6 (3.2)             | 53.4 (2.8)             | 50.9 (3.3)             | 0.950 |
| LDL-C ≥100 mg/dL                                   | 41.8 (2.4) | 38.3 (3.2) | 50.2 (5.6)   | 48.3 (3.2)             | 0.060        | 35.9 (4.6)             | 43.3 (4.5)             | 45.7 (5.0)             | 44.0 (4.3)             | 0.470 |
| LDL-C ≥130 mg/dL                                   | 18.0 (1.7) | 16.2 (2.4) | 23.6 (5.3)   | 20.1 (3.1)             | 0.430        | 16.9 (3.0)             | 17.9 (3.0)             | 22.9 (3.8)             | 14.2 (3.9)             | 0.250 |
| Elevated ABCs (A1c ≥7.0, BP ≥130/80, and LDL ≥100) |            |            |              |                        |              |                        |                        |                        |                        |       |
| None                                               | 15.7 (2.1) | 19.7 (3.2) | 10.9 (2.8)   | 7.4 (1.8)              | <b>0.017</b> | 18.1 (4.9)             | 15.9 (3.6)             | 12.9 (3.2)             | 18.6 (5.0)             | 0.567 |
| One elevated ABC                                   | 36.4 (2.7) | 34.9 (3.7) | 37.9 (5.4)   | 40.2 (3.3)             | 0.585        | 35.7 (4.9)             | 29.6 (4.3)             | 41.4 (5.8)             | 33.5 (4.9)             | 0.437 |
| Two elevated ABCs                                  | 35.3 (2.9) | 33.3 (3.7) | 37.0 (5.6)   | 40.8 (4.1)             | 0.411        | 36.5 (6.1)             | 42.0 (4.8)             | 34.8 (6.0)             | 33.0 (4.6)             | 0.571 |
| Three elevated ABCs                                | 12.3 (1.6) | 12.2 (2.0) | 14.2 (4.3)   | 11.6 (2.2)             | 0.808        | 9.8 (2.4)              | 12.5 (3.0)             | 10.9 (2.1)             | 15.0 (4.5)             | 0.732 |
| Any one elevated ABC                               | 84.3 (2.1) | 80.9 (3.0) | 89.7 (2.6)   | 92.0 (1.8)             | <b>0.015</b> | 81.4 (4.8)             | 84.8 (3.5)             | 88.0 (2.9)             | 82.3 (4.4)             | 0.424 |
| Elevated ABCs (A1c ≥8.0, BP ≥140/90 and LDL ≥130)  |            |            |              |                        |              |                        |                        |                        |                        |       |
| None                                               | 45.0 (2.6) | 48.5 (3.6) | 35.7 (5.3)   | 39.3 (3.7)             | 0.055        | 45.6 (5.2)             | 42.5 (4.5)             | 43.2 (5.8)             | 49.7 (4.9)             | 0.776 |
| One elevated ABC                                   | 40.6 (2.4) | 38.4 (3.0) | 47.6 (6.3)   | 43.4 (4.6)             | 0.228        | 44.1 (5.2)             | 44.1 (4.5)             | 41.5 (6.0)             | 32.2 (4.4)             | 0.286 |
| Two elevated ABCs                                  | 11.4 (1.6) | 9.8 (1.9)  | 15.4 (3.6)   | 14.4 (3.0)             | 0.135        | 7.6 (2.1)              | 11.5 (2.1)             | 10.3 (2.5)             | 16.5 (4.6)             | 0.320 |
| Three elevated ABCs                                | 3.0 (0.6)  | 3.4 (0.75) | <sup>3</sup> | 2.9 (1.6) <sup>2</sup> | 0.238        | 2.8 (1.5) <sup>2</sup> | 2.0 (0.7) <sup>1</sup> | 5.1 (2.0) <sup>1</sup> | 1.6 (0.8) <sup>2</sup> | 0.327 |
| Any one elevated ABC                               | 55.2 (2.6) | 51.6 (3.5) | 64.1 (5.3)   | 61.3 (3.7)             | <b>0.034</b> | 54.1 (5.1)             | 59.5 (4.4)             | 57.4 (5.5)             | 49.4 (4.8)             | 0.572 |

Health insurance categories are not mutually exclusive; estimates are among those with insurance

LDL-C were determined among the fasting sample only

Relative Standard Error (RSE): <sup>1</sup>RSE 30-40%; <sup>2</sup>RSE 40-50%; <sup>3</sup>RSE>50%, data do not meet the National Center for Health Statistics Data

Presentation Standards for Proportions

ABC, A1c, blood pressure, cholesterol

BP, blood pressure

BMI, body mass index

HEI, Healthy Eating Index

LDL-C, low-density lipoprotein cholesterol
