# Supplementary material for: Food insecurity, diet quality, and suboptimal diabetes management among US adults with diabetes
Source: PubMed Central journal article supplement — BMJ Open Diabetes Res Care. 2022 Oct 26;10(5):e003033. doi: 10.1136/bmjdrc-2022-003033 (PMC9615992; doi:10.1136/bmjdrc-2022-003033), 2022-10-26
Supplement: bmjdrc-2022-003033supp002.pdf [file bmjdrc-2022-003033supp002.pdf]

Appendix Table 2. Odds Ratio (95% CI) for Sub-Optimal Diabetes ABC Management by Food Insecurity and Diet Quality

|                                    | Total % (SE) | Food Insecurity |                   |                          | Diet Quality (HEI-2015) Quartiles |                   |                   |                          |
|------------------------------------|--------------|-----------------|-------------------|--------------------------|-----------------------------------|-------------------|-------------------|--------------------------|
|                                    |              | Food secure     | Marginal          | Food insecure            | Q4 (High)                         | Q3                | Q2                | Q1 (Low)                 |
| <b>HbA1c ≥7.0%</b>                 | 49.8 (1.8)   |                 |                   |                          |                                   |                   |                   |                          |
| Unadjusted                         |              | 1.00            | 1.20 (0.85, 1.68) | <b>1.33 (1.01, 1.75)</b> | 1.00                              | 1.13 (0.81, 1.57) | 1.36 (0.94, 1.97) | <b>1.56 (1.04, 2.32)</b> |
| Model 1                            |              | 1.00            | 1.24 (0.85, 1.80) | <b>1.36 (1.01, 1.83)</b> | 1.00                              | 1.10 (0.78, 1.55) | 1.36 (0.95, 1.95) | 1.47 (0.96, 2.26)        |
| Model 2                            |              | 1.00            | 1.23 (0.85, 1.80) | <b>1.44 (1.06, 1.96)</b> | 1.00                              | 1.09 (0.77, 1.56) | 1.39 (0.97, 1.98) | 1.49 (0.95, 2.33)        |
| Model 3                            |              | 1.00            | 1.24 (0.85, 1.80) | <b>1.44 (1.06, 1.97)</b> | 1.00                              | 1.11 (0.78, 1.58) | 1.42 (0.99, 2.03) | 1.53 (0.97, 2.41)        |
| Model 4                            |              | 1.00            | 1.16 (0.78, 1.73) | <b>1.47 (1.01, 2.16)</b> | 1.00                              | 1.10 (0.76, 1.59) | 1.27 (0.86, 1.88) | <b>1.63 (1.10, 2.42)</b> |
| Model 5                            |              | 1.00            | 1.21 (0.78, 1.87) | <b>1.62 (1.07, 2.47)</b> | 1.00                              | 1.06 (0.72, 1.55) | 1.29 (0.87, 1.92) | <b>1.61 (1.06, 2.46)</b> |
| <b>HbA1c ≥8.0%</b>                 | 26.1 (1.3)   |                 |                   |                          |                                   |                   |                   |                          |
| Unadjusted                         |              | 1.00            | 1.44 (0.92, 2.23) | <b>1.76 (1.30, 2.37)</b> | 1.00                              | 1.38 (0.93, 2.04) | 1.36 (0.90, 2.06) | <b>1.56 (1.06, 2.31)</b> |
| Model 1                            |              | 1.00            | 1.30 (0.82, 2.07) | <b>1.52 (1.12, 2.05)</b> | 1.00                              | 1.31 (0.89, 1.93) | 1.27 (0.84, 1.93) | 1.39 (0.92, 2.11)        |
| Model 2                            |              | 1.00            | 1.26 (0.77, 2.06) | <b>1.48 (1.04, 2.10)</b> | 1.00                              | 1.30 (0.88, 1.91) | 1.24 (0.82, 1.89) | 1.37 (0.90, 2.07)        |
| Model 3                            |              | 1.00            | 1.26 (0.77, 2.05) | <b>1.45 (1.01, 2.09)</b> | 1.00                              | 1.33 (0.91, 1.95) | 1.29 (0.85, 1.95) | 1.41 (0.93, 2.12)        |
| Model 4                            |              | 1.00            | 1.33 (0.81, 2.17) | <b>1.54 (1.07, 2.23)</b> | 1.00                              | 1.46 (0.89, 2.39) | 1.31 (0.80, 2.15) | <b>1.67 (1.09, 2.57)</b> |
| Model 5                            |              | 1.00            | 1.31 (0.81, 2.14) | <b>1.71 (1.14, 2.56)</b> | 1.00                              | 1.42 (0.85, 2.36) | 1.35 (0.80, 2.26) | <b>1.60 (1.01, 2.53)</b> |
| <b>HbA1c ≥9.0%</b>                 | 14.4 (1.0)   |                 |                   |                          |                                   |                   |                   |                          |
| Unadjusted                         |              | 1.00            | 1.27 (0.77, 2.11) | <b>2.03 (1.41, 2.91)</b> | 1.00                              | 1.24 (0.76, 2.03) | 1.07 (0.64, 1.80) | 1.64 (0.93, 2.91)        |
| Model 1                            |              | 1.00            | 1.05 (0.61, 1.81) | <b>1.61 (1.11, 2.34)</b> | 1.00                              | 1.16 (0.70, 1.92) | 0.91 (0.53, 1.55) | 1.44 (0.78, 2.65)        |
| Model 2                            |              | 1.00            | 0.96 (0.55, 1.67) | 1.40 (0.91, 2.17)        | 1.00                              | 1.15 (0.70, 1.91) | 0.89 (0.51, 1.52) | 1.42 (0.77, 2.62)        |
| Model 3                            |              | 1.00            | 0.93 (0.54, 1.62) | 1.34 (0.86, 2.11)        | 1.00                              | 1.20 (0.73, 1.96) | 0.93 (0.54, 1.63) | 1.47 (0.81, 2.68)        |
| Model 4                            |              | 1.00            | 1.02 (0.56, 1.85) | 1.46 (0.97, 2.21)        | 1.00                              | 1.33 (0.74, 2.41) | 0.97 (0.53, 1.78) | 1.76 (0.97, 3.19)        |
| Model 5                            |              | 1.00            | 1.16 (0.61, 2.21) | <b>1.59 (1.04, 2.43)</b> | 1.00                              | 1.37 (0.76, 2.47) | 0.98 (0.52, 1.84) | 1.66 (0.91, 3.00)        |
| <b>Blood Pressure ≥140/90 mmHg</b> | 28.5 (1.5)   |                 |                   |                          |                                   |                   |                   |                          |
| Unadjusted                         |              | 1.00            | 1.12 (0.76, 1.65) | 1.08 (0.79, 1.50)        | 1.00                              | 0.81 (0.56, 1.16) | 1.00 (0.69, 1.46) | 0.94 (0.68, 1.29)        |
| Model 1                            |              | 1.00            | 1.14 (0.81, 1.60) | 1.17 (0.84, 1.64)        | 1.00                              | 0.81 (0.54, 1.22) | 1.08 (0.71, 1.64) | 1.00 (0.68, 1.48)        |
| Model 2                            |              | 1.00            | 1.10 (0.79, 1.55) | 1.10 (0.74, 1.63)        | 1.00                              | 0.80 (0.53, 1.19) | 1.03 (0.68, 1.57) | 0.99 (0.66, 1.48)        |
| Model 3                            |              | 1.00            | 1.11 (0.79, 1.55) | 1.11 (0.74, 1.64)        | 1.00                              | 0.79 (0.53, 1.19) | 1.03 (0.68, 1.55) | 0.98 (0.66, 1.46)        |
| Model 4                            |              | 1.00            | 1.10 (0.80, 1.63) | 1.05 (0.69, 1.60)        | 1.00                              | 0.85 (0.55, 1.31) | 1.05 (0.69, 1.60) | 1.08 (0.68, 1.72)        |
| Model 5                            |              | 1.00            | 1.07 (0.75, 1.54) | 0.99 (0.64, 1.53)        | 1.00                              | 0.81 (0.52, 1.24) | 1.01 (0.66, 1.54) | 1.07 (0.67, 1.69)        |
| <b>Blood Pressure ≥130/80 mmHg</b> | 52.0 (1.5)   |                 |                   |                          |                                   |                   |                   |                          |
| Unadjusted                         |              | 1.00            | 1.06 (0.67, 1.67) | 1.01 (0.73, 1.40)        | 1.00                              | 0.99 (0.69, 1.42) | 1.06 (0.75, 1.50) | 0.96 (0.69, 1.34)        |
| Model 1                            |              | 1.00            | 1.10 (0.71, 1.71) | 1.08 (0.77, 1.52)        | 1.00                              | 1.02 (0.70, 1.49) | 1.11 (0.76, 1.63) | 0.96 (0.66, 1.40)        |
| Model 2                            |              | 1.00            | 1.02 (0.66, 1.60) | 0.96 (0.66, 1.40)        | 1.00                              | 1.00 (0.69, 1.46) | 1.10 (0.74, 1.63) | 0.94 (0.63, 1.39)        |

|                                                                                   |            |      |                          |                          |      |                   |                   |                   |
|-----------------------------------------------------------------------------------|------------|------|--------------------------|--------------------------|------|-------------------|-------------------|-------------------|
| Model 3                                                                           |            | 1.00 | 1.01 (0.66, 1.56)        | 0.96 (0.66, 1.38)        | 1.00 | 1.01 (0.69, 1.48) | 1.13 (0.77, 1.67) | 0.95 (0.64, 1.40) |
| Model 4                                                                           |            | 1.00 | 1.01 (0.65, 1.58)        | 0.91 (0.61, 1.35)        | 1.00 | 1.03 (0.67, 1.58) | 1.12 (0.73, 1.74) | 0.95 (0.62, 1.45) |
| Model 5                                                                           |            | 1.00 | 0.96 (0.59, 1.54)        | 0.88 (0.58, 1.33)        | 1.00 | 1.00 (0.65, 1.55) | 1.12 (0.72, 1.74) | 0.93 (0.60, 1.44) |
| <b>LDL-C ≥100 mg/dL</b>                                                           | 41.8 (2.4) |      |                          |                          |      |                   |                   |                   |
| Unadjusted                                                                        |            | 1.00 | 1.62 (0.98, 2.68)        | <b>1.50 (1.05, 2.15)</b> | 1.00 | 1.37 (0.79, 2.36) | 1.50 (0.91, 2.50) | 1.40 (0.78, 2.52) |
| Model 1                                                                           |            | 1.00 | 1.36 (0.78, 2.39)        | 1.19 (0.76, 1.85)        | 1.00 | 1.15 (0.64, 2.06) | 1.20 (0.71, 2.02) | 1.12 (0.61, 2.06) |
| Model 2                                                                           |            | 1.00 | 1.21 (0.66, 2.20)        | 1.02 (0.65, 1.60)        | 1.00 | 1.19 (0.66, 2.15) | 1.26 (0.76, 2.08) | 1.25 (0.74, 2.04) |
| Model 3                                                                           |            | 1.00 | 1.18 (0.62, 2.21)        | 1.08 (0.69, 1.69)        | 1.00 | 1.16 (0.65, 2.06) | 1.25 (0.74, 2.12) | 1.10 (0.59, 2.02) |
| Model 4                                                                           |            | 1.00 | 0.98 (0.49, 1.99)        | 1.07 (0.63, 1.80)        | 1.00 | 1.17 (0.65, 2.10) | 1.23 (0.72, 2.09) | 1.05 (0.56, 1.97) |
| Model 5                                                                           |            | 1.00 | 0.95 (0.47, 1.95)        | 1.01 (0.60, 1.71)        | 1.00 | 1.06 (0.55, 2.02) | 1.20 (0.70, 2.05) | 0.97 (0.54, 1.75) |
| <b>LDL-C ≥ 130mg/dL</b>                                                           | 18.0 (1.7) |      |                          |                          |      |                   |                   |                   |
| Unadjusted                                                                        |            | 1.00 | 1.60 (0.76, 3.37)        | 1.31 (0.77, 2.24)        | 1.00 | 1.07 (0.60, 1.91) | 1.46 (0.75, 2.85) | 0.82 (0.36, 1.88) |
| Model 1                                                                           |            | 1.00 | 1.34 (0.63, 2.83)        | 1.06 (0.60, 1.85)        | 1.00 | 0.85 (0.45, 1.61) | 1.09 (0.55, 2.18) | 0.64 (0.29, 1.44) |
| Model 2                                                                           |            | 1.00 | 1.17 (0.56, 2.47)        | 0.94 (0.46, 1.92)        | 1.00 | 0.88 (0.48, 1.63) | 1.18 (0.59, 2.36) | 0.65 (0.30, 1.37) |
| Model 3                                                                           |            | 1.00 | 1.16 (0.54, 2.48)        | 0.99 (0.50, 1.97)        | 1.00 | 0.91 (0.50, 1.67) | 1.21 (0.60, 2.44) | 0.63 (0.29, 1.35) |
| Model 4                                                                           |            | 1.00 | 0.77 (0.38, 1.55)        | 0.87 (0.42, 1.80)        | 1.00 | 0.75 (0.41, 1.38) | 1.32 (0.63, 2.73) | 0.56 (0.27, 1.18) |
| Model 5                                                                           |            | 1.00 | 0.70 (0.35, 1.40)        | 0.82 (0.40, 1.69)        | 1.00 | 0.76 (0.41, 1.40) | 1.31 (0.61, 2.84) | 0.57 (0.28, 1.18) |
| <b>Any one elevated ABC</b><br>[HbA1c ≥7.0%, BP ≥130/80mmHg, LDL ≥100mg/dL]       | 84.3 (2.1) |      |                          |                          |      |                   |                   |                   |
| Unadjusted                                                                        |            | 1.00 | <b>2.06 (1.06, 4.03)</b> | <b>2.71 (1.46, 5.06)</b> | 1.00 | 1.27 (0.55, 2.96) | 1.68 (0.77, 3.67) | 1.06 (0.45, 2.52) |
| Model 1                                                                           |            | 1.00 | 1.77 (0.95, 3.31)        | <b>2.09 (1.13, 3.88)</b> | 1.00 | 0.98 (0.41, 2.34) | 1.30 (0.57, 2.96) | 0.76 (0.30, 1.92) |
| Model 2                                                                           |            | 1.00 | 1.67 (0.91, 3.07)        | <b>1.88 (1.07, 3.30)</b> | 1.00 | 0.96 (0.40, 2.31) | 1.28 (0.56, 2.97) | 0.70 (0.28, 1.78) |
| Model 3                                                                           |            | 1.00 | 1.66 (0.90, 3.07)        | <b>1.89 (1.05, 3.39)</b> | 1.00 | 0.97 (0.41, 2.33) | 1.30 (0.56, 3.00) | 0.70 (0.28, 1.77) |
| Model 4                                                                           |            | 1.00 | 1.97 (0.91, 4.28)        | 1.91 (0.94, 3.89)        | 1.00 | 1.08 (0.40, 2.92) | 1.41 (0.62, 3.22) | 0.64 (0.24, 1.70) |
| Model 5                                                                           |            | 1.00 | 1.89 (0.84, 4.26)        | 1.89 (0.91, 4.94)        | 1.00 | 1.04 (0.38, 2.85) | 1.30 (0.57, 2.99) | 0.64 (0.23, 1.76) |
| <b>Any one elevated ABC</b><br>[HbA1c ≥8.0% and BP ≥140/90mmHg and LDL ≥130mg/dL] | 55.2 (2.6) |      |                          |                          |      |                   |                   |                   |
| Unadjusted                                                                        |            | 1.00 | 1.57 (0.99, 2.82)        | 1.49 (1.00, 2.22)        | 1.00 | 1.24 (0.74, 2.08) | 1.14 (0.65, 1.99) | 0.83 (0.49, 1.39) |
| Model 1                                                                           |            | 1.00 | 1.45 (0.87, 2.41)        | 1.34 (0.91, 1.97)        | 1.00 | 1.08 (0.64, 1.82) | 1.07 (0.59, 1.95) | 0.76 (0.43, 1.34) |
| Model 2                                                                           |            | 1.00 | 1.28 (0.74, 2.21)        | 1.25 (0.85, 1.84)        | 1.00 | 1.06 (0.62, 1.81) | 1.06 (0.58, 1.96) | 0.75 (0.41, 1.36) |
| Model 3                                                                           |            | 1.00 | 1.26 (0.73, 2.19)        | 1.28 (0.85, 1.93)        | 1.00 | 1.10 (0.66, 1.86) | 1.12 (0.61, 2.08) | 0.76 (0.42, 1.37) |
| Model 4                                                                           |            | 1.00 | 1.18 (0.65, 2.12)        | 1.33 (0.84, 2.11)        | 1.00 | 1.15 (0.62, 2.11) | 1.25 (0.67, 2.33) | 0.78 (0.42, 1.42) |
| Model 5                                                                           |            | 1.00 | 1.14 (0.63, 2.06)        | 1.25 (0.76, 2.07)        | 1.00 | 1.10 (0.58, 2.06) | 1.19 (0.61, 2.33) | 0.72 (0.38, 1.37) |

Model 1: adjusted for age, sex, race/ethnicity

Model 2: additionally adjusted for poverty income ratio, education, health insurance

Model 3: additionally adjusted for healthcare utilization (seeing physicians in past year, having HbA1c checked)

Model 4: additionally adjusted for smoking status, diabetes medications, blood pressure medication, cholesterol medication, BMI

Model 5: additionally adjusted for food security (when HEI is main covariate) or HEI (when food security is main covariate),

Boldface p-value indicates statistical significance of  $p < 0.05$

SE, standard error
