# Supplementary material for: Food insecurity, diet quality, and suboptimal diabetes management among US adults with diabetes
Source: PubMed Central journal article supplement — BMJ Open Diabetes Res Care. 2022 Oct 26;10(5):e003033. doi: 10.1136/bmjdrc-2022-003033 (PMC9615992; doi:10.1136/bmjdrc-2022-003033), 2022-10-26
Supplement: bmjdrc-2022-003033supp003.pdf [file bmjdrc-2022-003033supp003.pdf]

Appendix Table 3. Odds Ratio (95% CI) for Sub-Optimal Diabetes ABC Management by Food Security and Diet Quality

|                                    | <b>Food Security &amp; Diet Quality Categories (HEI-2015)<sup>a</sup></b> |                                                           |                                                   |                                                             |
|------------------------------------|---------------------------------------------------------------------------|-----------------------------------------------------------|---------------------------------------------------|-------------------------------------------------------------|
|                                    | <b>Food Secure &amp; High Diet Quality (Q4)</b>                           | <b>Food Secure &amp; Low/Moderate Diet Quality (Q1-3)</b> | <b>Food Insecure &amp; High Diet Quality (Q4)</b> | <b>Food Insecure &amp; Low/Moderate Diet Quality (Q1-3)</b> |
| <b>A1c ≥7.0%</b>                   |                                                                           |                                                           |                                                   |                                                             |
| Unadjusted                         | 1.00                                                                      | 1.31 (0.88, 1.96)                                         | 1.33 (0.75, 2.34)                                 | <b>1.71 (1.18, 2.48)</b>                                    |
| Model 1                            | 1.00                                                                      | 1.21 (0.79, 1.86)                                         | 1.19 (0.69, 2.07)                                 | <b>1.71 (1.15, 2.56)</b>                                    |
| Model 2                            | 1.00                                                                      | 1.22 (0.79, 1.89)                                         | 1.23 (0.70, 2.15)                                 | <b>1.82 (1.21, 2.73)</b>                                    |
| Model 3                            | 1.00                                                                      | 1.24 (0.80, 1.90)                                         | 1.18 (0.67, 2.08)                                 | <b>1.86 (1.24, 2.78)</b>                                    |
| Model 4                            | 1.00                                                                      | 1.30 (0.86, 1.97)                                         | 1.45 (0.82, 2.57)                                 | <b>1.82 (1.21, 2.75)</b>                                    |
| <b>A1c ≥8.0%</b>                   |                                                                           |                                                           |                                                   |                                                             |
| Unadjusted                         | 1.00                                                                      | 1.48 (0.88, 2.47)                                         | <b>2.07 (1.08, 3.87)</b>                          | <b>2.36 (1.49, 3.73)</b>                                    |
| Model 1                            | 1.00                                                                      | 1.30 (0.77, 2.19)                                         | 1.54 (0.80, 2.96)                                 | <b>1.93 (1.20, 3.09)</b>                                    |
| Model 2                            | 1.00                                                                      | 1.29 (0.77, 2.14)                                         | 1.49 (0.78, 2.83)                                 | <b>1.86 (1.13, 3.06)</b>                                    |
| Model 3                            | 1.00                                                                      | 1.30 (0.79, 2.17)                                         | 1.41 (0.75, 2.67)                                 | <b>1.89 (1.13, 3.15)</b>                                    |
| Model 4                            | 1.00                                                                      | 1.50 (0.85, 2.64)                                         | 1.66 (0.91, 3.01)                                 | <b>2.22 (1.30, 3.79)</b>                                    |
| <b>A1c ≥9.0%</b>                   |                                                                           |                                                           |                                                   |                                                             |
| Unadjusted                         | 1.00                                                                      | 1.19 (0.61, 2.33)                                         | 1.75 (0.81, 3.76)                                 | <b>2.28 (1.17, 4.43)</b>                                    |
| Model 1                            | 1.00                                                                      | 0.98 (0.49, 1.92)                                         | 1.12 (0.52, 2.38)                                 | 1.65 (0.82, 3.30)                                           |
| Model 2                            | 1.00                                                                      | 0.96 (0.49, 1.88)                                         | 1.01 (0.46, 2.24)                                 | 1.50 (0.74, 3.06)                                           |
| Model 3                            | 1.00                                                                      | 0.98 (0.51, 1.90)                                         | 0.91 (0.41, 1.99)                                 | 1.51 (0.72, 3.16)                                           |
| Model 4                            | 1.00                                                                      | 1.14 (0.54, 2.40)                                         | 1.03 (0.45, 2.40)                                 | 1.71 (0.82, 3.57)                                           |
| <b>Blood Pressure ≥140/90 mmHg</b> |                                                                           |                                                           |                                                   |                                                             |
| Unadjusted                         | 1.00                                                                      | 0.82 (0.57, 1.18)                                         | 0.85 (0.52, 1.40)                                 | 0.96 (0.64, 1.44)                                           |
| Model 1                            | 1.00                                                                      | 0.86 (0.57, 1.30)                                         | 0.91 (0.53, 1.57)                                 | 1.02 (0.65, 1.61)                                           |
| Model 2                            | 1.00                                                                      | 0.85 (0.56, 1.27)                                         | 0.87 (0.51, 1.50)                                 | 0.95 (0.59, 1.55)                                           |
| Model 3                            | 1.00                                                                      | 0.84 (0.56, 1.26)                                         | 0.88 (0.51, 1.53)                                 | 0.96 (0.59, 1.55)                                           |
| Model 4                            | 1.00                                                                      | 0.89 (0.58, 1.36)                                         | 0.87 (0.51, 1.51)                                 | 0.98 (0.60, 1.60)                                           |
| <b>Blood Pressure ≥130/80 mmHg</b> |                                                                           |                                                           |                                                   |                                                             |
| Unadjusted                         | 1.00                                                                      | 0.99 (0.67, 1.47)                                         | 1.01 (0.58, 1.76)                                 | 0.99 (0.68, 1.46)                                           |
| Model 1                            | 1.00                                                                      | 1.04 (0.67, 1.63)                                         | 1.16 (0.65, 2.08)                                 | 1.08 (0.71, 1.65)                                           |
| Model 2                            | 1.00                                                                      | 1.04 (0.66, 1.63)                                         | 1.06 (0.57, 1.96)                                 | 0.96 (0.62, 1.47)                                           |
| Model 3                            | 1.00                                                                      | 1.04 (0.67, 1.64)                                         | 1.02 (0.56, 1.86)                                 | 0.97 (0.64, 1.47)                                           |
| Model 4                            | 1.00                                                                      | 1.08 (0.66, 1.75)                                         | 1.06 (0.59, 1.88)                                 | 0.94 (0.61, 1.43)                                           |
| <b>LDL-C ≥100 mg/dL</b>            |                                                                           |                                                           |                                                   |                                                             |
| Unadjusted                         | 1.00                                                                      | 1.50 (0.80, 2.81)                                         | 2.12 (0.88, 5.13)                                 | <b>2.18 (1.23, 3.86)</b>                                    |
| Model 1                            | 1.00                                                                      | 1.22 (0.65, 2.32)                                         | 1.61 (0.60, 4.29)                                 | 1.50 (0.83, 2.70)                                           |
| Model 2                            | 1.00                                                                      | 1.24 (0.66, 2.33)                                         | 1.35 (0.52, 3.48)                                 | 1.34 (0.75, 2.40)                                           |
| Model 3                            | 1.00                                                                      | 1.17 (0.63, 2.18)                                         | 1.18 (0.45, 3.12)                                 | 1.33 (0.74, 2.39)                                           |
| Model 4                            | 1.00                                                                      | 1.06 (0.56, 1.98)                                         | 0.96 (0.26, 2.58)                                 | 1.07 (0.53, 2.18)                                           |

|                                                                                                                         |      |                   |                          |                          |
|-------------------------------------------------------------------------------------------------------------------------|------|-------------------|--------------------------|--------------------------|
| <b>LDL-C <math>\geq</math>130 mg/dL</b>                                                                                 |      |                   |                          |                          |
| Unadjusted                                                                                                              | 1.00 | 1.36 (0.58, 3.17) | 3.02 (0.92, 9.96)        | 1.67 (0.75, 3.71)        |
| Model 1                                                                                                                 | 1.00 | 1.01 (0.45, 2.28) | 2.17 (0.61, 7.71)        | 1.07 (0.49, 2.36)        |
| Model 2                                                                                                                 | 1.00 | 1.03 (0.48, 2.20) | 1.90 (0.50, 7.24)        | 1.03 (0.43, 2.47)        |
| Model 3                                                                                                                 | 1.00 | 1.02 (0.49, 2.11) | 1.80 (0.47, 6.97)        | 1.05 (0.47, 2.37)        |
| Model 4                                                                                                                 | 1.00 | 1.00 (0.48, 2.10) | 1.39 (0.34, 5.67)        | 0.73 (0.30, 1.75)        |
| <b>At least one elevated ABC (A1c <math>\geq</math>7.0, BP <math>\geq</math>130/80, LDL <math>\geq</math>100)</b>       |      |                   |                          |                          |
| Unadjusted                                                                                                              | 1.00 | 1.14 (0.52, 2.52) | <b>2.60 (1.06, 6.41)</b> | <b>2.91 (1.26, 6.72)</b> |
| Model 1                                                                                                                 | 1.00 | 0.89 (0.39, 2.02) | 1.95 (0.79, 4.85)        | 1.86 (0.79, 4.38)        |
| Model 2                                                                                                                 | 1.00 | 0.87 (0.38, 1.98) | 1.75 (0.65, 4.68)        | 1.72 (0.75, 3.99)        |
| Model 3                                                                                                                 | 1.00 | 0.87 (0.38, 1.96) | 1.63 (0.60, 4.37)        | 1.73 (0.74, 4.01)        |
| Model 4                                                                                                                 | 1.00 | 0.91 (0.38, 2.15) | 1.63 (0.63, 4.24)        | 1.91 (0.69, 5.31)        |
| <b>At least one elevated ABC (A1c <math>\geq</math>8.0 and BP <math>\geq</math>140/90 and LDL <math>\geq</math>130)</b> |      |                   |                          |                          |
| Unadjusted                                                                                                              | 1.00 | 1.10 (0.61, 1.96) | <b>2.78 (1.41, 5.49)</b> | 1.54 (0.93, 2.56)        |
| Model 1                                                                                                                 | 1.00 | 0.99 (0.53, 1.84) | <b>2.18 (1.06, 4.49)</b> | 1.28 (0.75, 2.16)        |
| Model 2                                                                                                                 | 1.00 | 0.97 (0.51, 1.82) | 1.96 (0.93, 4.15)        | 1.20 (0.69, 2.07)        |
| Model 3                                                                                                                 | 1.00 | 0.98 (0.53, 1.81) | 1.76 (0.83, 3.72)        | 1.23 (0.71, 2.14)        |
| Model 4                                                                                                                 | 1.00 | 1.06 (0.53, 2.09) | 1.68 (0.77, 3.70)        | 1.25 (0.66, 2.34)        |

Model 1: adjusted for age, sex, race/ethnicity

Model 2: additionally adjusted for PIR, education, health insurance

Model 3: additionally adjusted for healthcare utilization (seeing physicians in past year, having HbA1c checked)

Model 4: additionally adjusted for smoking status, diabetes medications, blood pressure medication, cholesterol medication, BMI

<sup>a</sup> Food insecurity is defined as marginal or low/very low food security; food secure is defined as full food security; Low/moderate diet quality is defined as HEI-2015 score in the 1<sup>st</sup>-3<sup>rd</sup> quartiles; High diet quality is defined as HEI-2015 in the 4<sup>th</sup> quartile

Boldface p-value indicates statistical significance of  $p < 0.05$
